# Supplementary material
Source: publisher site journal article supplement (https://www.dovepress.com/article/supplementary_file/590498/590498%20Appendix%20A-C.docx)
Supplement: Supplementary file 1 [file 590498%20Appendix%20A-C.docx]

Appendix A: Data extraction form

| **Section** | **Data to be collected** |
| --- | --- |
| Study identification | Author(s), year, title, journal |
| Publication details | Country, language, publication type, DOI/URL |
| Study characteristics | Study design, aim/objective, setting, clinical domain |
| Population/sample | Sample size, participant type, inclusion criteria |
| GenAI details | AI model/tool used, version, application area |
| Comparator/context | Human-only, AI-assisted, alternative model, no comparator |
| Outcomes for RQ1 | Efficiency gains, decision-support benefits, accuracy, speed, workflow impact |
| Outcomes for RQ2 | Automation bias, deskilling, overreliance, diagnostic errors, judgment issues |
| Outcomes for RQ3 | Mitigation strategies, governance, training, human-in-the-loop suggestions |
| Methods quality | Risk of bias, strengths, limitations, appraisal notes |
| Key findings | Main results relevant to the review questions |

# Appendix B

**Table B1.** Summary of studies included in the review

| **Sr.No.** | **Author(s), Year** | **Study Design** | **Population/Setting** | **Sample Size/Units** | **GenAI Application** | **Findings related to RQ1 (Efficiency & Decision Support)** | **Findings related to RQ2 (Negative Impacts)** | **Findings related to RQ3 (Recommendations & Mitigations)** | **Limitations/ Criticisms** |
| --- | --- | --- | --- | --- | --- | --- | --- | --- | --- |
| 1 | Sadeghi et al. [29] | Systematic Review | AI in healthcare (global studies on explainable AI) | 113 studies | Explainable Artificial Intelligence (XAI) in clinical systems | XAI improves clinician understanding of AI reasoning, enhancing trust, interpretability, and decision precision. | Overreliance on opaque models reduces accountability and can undermine clinicians’ diagnostic transparency. | Promotes human-centric and hybrid XAI frameworks integrating cognitive psychology and UX design for transparency. | Narrative bias; no clinical data validation. |
| 2 | Budzyn et al. [13] | Observational Study | Clinical endoscopy; medical centers with AI diagnostic assistance | 125 endoscopists | AI for endoscopic lesion detection | AI support improved lesion detection and reduced procedure time. | Experienced endoscopists showed reduced engagement and interpretive independence—signs of deskilling. | Recommend alternating AI-assisted and manual practice to preserve clinical reasoning. | Short-term observation; lacks longitudinal validation. |
| 3 | Goh et al. [45] | Controlled Experimental Study | Physicians using LLM-assisted differential diagnosis | 100 clinicians | LLMs (GPT-4, MedPaLM) in diagnostic reasoning | Improved diagnostic accuracy (from 64% to 82%) and reduced time to decision. | Overconfidence bias observed—clinicians overtrusted incorrect model outputs. | Encourage hybrid model—AI suggestion followed by human verification. | Focused on vignettes; limited real-world testing. |
| 4 | Drarsch et al. [38] | Experimental Study | Radiologists reading mammograms with AI assistance | 27 radiologists, 50 mammograms | AI-aided BI-RADS diagnostic support | AI improved initial accuracy but introduced automation bias when incorrect. | All experience levels showed automation bias; inexperienced users most affected. | Emphasize human-AI partnership; include feedback on AI error patterns. | Simulated AI, not real system; single task context. |
| 5 | Ranji [40] | Experimental Validation | LLM diagnostic testing on simulated patient data | 120 simulated cases | GPT-3.5 and GPT-4 for endocrine diagnosis | GPT-4 reduced diagnostic latency by 30% vs. manual entry. | Incorrect DKA identification in 16% of cases; risk of misleading clinical judgment. | Suggest real-world clinical trials and improved contextual reasoning modules. | Limited to synthetic data; narrow condition scope. |
| 6 | Tikhomirov et al. [37] | Theoretical Viewpoint / Conceptual Analysis | Radiologists and clinicians in diagnostic decision-making contexts; focus on radiology as model domain | N/A | Medical decision systems using artificial intelligence (AI) — particularly diagnostic AI tools in radiology and clinical reasoning contexts | AI systems accelerate diagnostic processes and enable large-scale analysis of imaging data; demonstrate computational efficiency but not necessarily cognitive efficiency for clinicians. The authors distinguish between *technological efficiency* (AI speed) and *clinical cognitive efficiency* (human interpretive reasoning), noting a widening “AI chasm.” | AI models are “dataset-bounded” and lack ecological reasoning; clinicians are “ecologically bounded,” drawing from contextual cues. This mismatch risks *debounding* clinical reasoning, leading to reduced epistemic humility, overreliance, and inability to detect AI biases. Overreliance on AI explanations can create an illusion of understanding and cognitive deskilling. | Proposes shifting research toward *cognitive-level* and *cognitive-model-level* analyses of human–AI interaction. Advocates for incorporating cognitive science and human factors into AI design. Recommends distinguishing between human and AI reasoning processes rather than forcing artificial “team” analogies. Calls for new standards emphasizing clinician cognition, explainability, and trust calibration. | Conceptual (no primary data). The framework applies mainly to diagnostic imaging contexts, not validated across other specialities. Does not empirically quantify the cognitive mismatch or test interventions. |
| 7 | Iqbal et al. [32] | **Umbrella review and evidence synthesis** of systematic reviews and meta-analyses | Secondary evidence base — systematic reviews covering clinicians, educators, and patients in diverse healthcare contexts (radiology, neurosurgery, gastroenterology, dentistry, ophthalmology, and general medicine) | 17 included reviews (15 systematic reviews, 2 meta-analyses) | ChatGPT (versions 3.0, 3.5, and 4.0) in healthcare decision-making, medical education, clinical documentation, manuscript writing, and patient engagement | ChatGPT enhances workflow efficiency in clinical documentation, patient communication, and research writing. It demonstrates utility in diagnostic support, manuscript generation, and answering medical queries. Across domains (radiology, neurosurgery, public health), the model improved response accuracy and clinician throughput. Reported benefits include time saving, rapid summarisation, and improved accessibility to clinical information. | Overreliance on ChatGPT may promote automation bias, factual inaccuracies, plagiarism, and information “infodemics.” Quality appraisal (AMSTAR-2) showed 70.6% of reviews were of low methodological quality, implying weak validation of claims. In clinical contexts, ChatGPT can misinform or oversimplify complex reasoning, threatening clinician interpretive expertise and public trust. | Authors urge **ethical governance**, **transparency**, and **policy frameworks** for ChatGPT’s deployment. Recommend structured clinician oversight, verification of AI outputs, and adherence to evidence-based standards. Stress need for continuous evaluation, data privacy protections, and regulatory guidelines before clinical integration. Policymakers must establish validation mechanisms and AI literacy training for professionals. | High heterogeneity across included reviews; mostly descriptive rather than analytical. Absence of quantitative synthesis due to methodological diversity. Many included reviews failed to justify inclusion criteria or address funding bias. Limited empirical evidence of real-world outcomes. |
| 8 | Najjar [42] | Narrative Review | Focus on radiology and medical imaging; discussion of AI implementation across modalities (CT, MRI, PET, ultrasound) | Not empirical; integrates multiple case studies and secondary data | AI and machine learning integration in radiology, including deep learning (CNNs), CAD, radiomics, and predictive analytics | AI enhances image acquisition, segmentation, and diagnostic precision. Improves workflow efficiency, reduces report turnaround time, and aids personalised medicine through radiomics and predictive models. | Risks include overreliance on algorithms, “black box” opacity, data bias, and clinician detachment from cognitive diagnostic processes. Ethical concerns about accountability and the erosion of interpretive skills. | Advocates for explainable AI (XAI), collaborative frameworks between radiologists and AI developers, and AI-literacy integration in training. Emphasises ethical governance and preservation of human expertise in patient care. | Narrative (non-systematic) design; no quantitative synthesis or empirical validation. Focused primarily on radiology, limiting cross-specialty generalisation. |
| 9 | Arab et al. [47] | Narrative Review | Clinical and operational AI applications across multiple healthcare domains; focus on transitioning from clinical trial success to real-world deployment | Thematic synthesis of studies (2014–2024) — no empirical sample | AI tools in diagnostics, therapeutics, and healthcare operations, including ML, LLMs, and predictive models | AI enhances diagnostic accuracy, reduces planning time, and improves workflow efficiency in controlled environments but exhibits reduced performance in real-world contexts due to bias and data heterogeneity. | Identified algorithmic bias, workflow disruption, clinician overreliance, and reduced generalizability across populations as key barriers to maintaining expertise. | Proposed **AI Healthcare Integration Framework (AI-HIF)** — a five-stage model integrating TAM and CFIR theories to enhance validation, stakeholder engagement, governance, deployment, and continuous evaluation. | Conceptual synthesis without empirical testing; possible bias from rapid technological evolution and heterogeneous included studies. |
| 10 | Ueda et al. [26] | Systematic Comparative Study | AI models (ChatGPT, Llama2, Google Search) for clinical tasks | 100 case-based tasks | Comparative performance evaluation of GenAI tools | GPT-4 achieved highest diagnostic consistency and information retrieval accuracy. | Llama2 and GPT-3.5 showed hallucinations; automation bias observed in clinical reasoning. | Recommends framework for validating LLMs before deployment in diagnostics. | Limited to text-based testing; no multimodal data. |
| 11 | Hirosawa et al. [25] | Experimental Study | Physicians and AI systems; differential diagnosis lists from case reports in *American Journal of Case Reports* | 392 case reports, generating 1176 differential diagnosis lists | GPT-4 (ChatGPT), Google Bard (Gemini), and LLaMA2 evaluated for diagnostic accuracy in identifying final diagnoses within differential lists | GPT-4 matched physicians’ evaluations in 82.1% of cases (κ = 0.63), showing fair to good agreement and potential to streamline diagnostic feedback loops. | GPT-4 failed to identify the correct final diagnosis in 16% of cases; reliance on text pattern matching, lacking human clinical reasoning, highlights overreliance risk. | Suggests continuous model training with medical datasets, alignment across versions, and integration into diagnostic education for calibrated human-AI feedback. | Based on case reports (not real-world settings); GPT-4 not medically fine-tuned; lacks ethical validation and contextual reasoning testing. |
| 12 | Morone et al. [10] | Umbrella review | Systematic reviews of AI applications in clinical medicine (161 SRs; 7,672 primary studies across 41 medical fields) | 161 systematic reviews (screened from 1,923) | Artificial intelligence and machine learning applications in clinical medicine (diagnosis, prognosis, treatment, decision support, and rehabilitation) | AI, particularly ML/DL, improved diagnostic accuracy, prediction, and clinical decision-making across oncology, neurology, radiology, and other fields. Efficiency gains noted in diagnosis (44.4%) and prognosis tasks (13.9%). | Many studies lacked methodological rigor—less than 50% performed bias analysis, and only 39% evaluated AI metrics. Overreliance and dataset bias risk undermining clinician expertise and decision integrity. | Developed **CLASMOD-AI** tool for reporting and evaluating AI in SRs. Advocated for PRISMA-AI, AI-specific ROB tools (PROBAST-AI, QUADAS-AI), and improved dataset transparency to balance accuracy with interpretability. | Lack of validation for CLASMOD-AI; heterogeneity across SRs; overlap of primary studies; insufficient inclusion of ethical and equity considerations; limited longitudinal data. |
| 13 | Hasanzadeh et al. [4] | Critical Narrative Review | AI models across healthcare disciplines; focus on bias, fairness, and equity in clinical AI development and deployment | 94 studies reviewed (1993–2024) | AI and ML systems for diagnostics, imaging, and predictive medicine; focus on identifying and mitigating bias across AI model lifecycle | AI enhances diagnostic and predictive efficiency, especially in radiology, cardiology, and neurology; however, bias limits equitable generalizability and consistent performance. | Highlights automation bias, feedback loop bias, and clinician deskilling; bias in model conception and data handling can erode professional judgment and reinforce inequities. | Introduces a *Model Life-Cycle Framework* for bias detection and mitigation across conception, data collection, development, and deployment phases. Recommends fairness metrics (e.g., equalized odds, causal fairness), red-teaming, and federated learning for equitable model improvement. | Review only; lacks empirical validation. The framework remains conceptual and may not be scalable across low-resource healthcare contexts. |
| 14 | Beheshti et al. [31] | Systematic Review (LLM-assisted PRISMA framework) | Peer-reviewed studies assessing ChatGPT’s responses to health-related questions across multiple medical specialties | 128 studies included (out of 1101 screened from PubMed) | ChatGPT (versions 3.5 and 4.0) used for diagnostic, educational, and disease management inquiries in healthcare | Mean accuracy of ChatGPT across studies: **73.4%**. Highest in psychiatry and dermatology; moderate in radiology and orthopedics. Demonstrated reliability for educational and informational queries. | Inconsistent performance across complex fields like endocrinology and pharmacology. Accuracy varies by context (education > diagnosis). Risks include hallucination, uneven reliability, and overconfidence bias. | Proposed *Adjusted Accuracy Metric* to normalize results across studies. Recommends standardization of evaluation metrics, improved prompt engineering, and continuous model refinement. No major difference between GPT-3.5 and GPT-4 overall (p = 0.96). | Limited to PubMed database; potential recall bias in AI-assisted screening; heterogeneity in study design and metrics; subjective evaluation by human judges. |
| 15 | Arvai et al. [30] | Scoping Review (PRISMA-ScR framework) | Health care professionals (physicians, nurses, students) from 32 included studies across multiple countries (Saudi Arabia, South Korea, UK, Canada, etc.) | 32 studies included from 217 screened | AI and ML tools in healthcare; focus on clinicians’ psychological and professional attitudes toward medical AI adoption | AI recognized for easing diagnostic and administrative workloads, enhancing data analysis, and supporting clinical decision-making. HCPs acknowledge potential to improve consultation quality and precision medicine. | Main concerns include job displacement, deskilling, technostress, identity threat, loss of autonomy, and ethical ambiguity. Fear and anxiety dominate attitudes, reflecting both intrinsic (identity, skills) and extrinsic (patient care, ethics) concerns. | Education, regulation, and clinician involvement in AI development identified as key solutions. Proposes an *attitude scale* (skepticism → fear) and recommends structured AI training, ethical legislation, and shared accountability frameworks. | Limited to PubMed and English-language studies; possible publication and selection bias; descriptive synthesis without meta-analysis; rapidly evolving field may outdate findings. |
| 16 | Banerji et al. [33] | Viewpoint (Expert Perspective) | Multimodal AI in clinical decision-making; cross-institutional perspective (UCL, NHS, Roche) | Conceptual (no empirical data) | Multimodal AI combining text, image, genomic, and sensor data for clinical diagnostics | Multimodal AI improves diagnostic synthesis by integrating diverse modalities, offering richer decision support and earlier detection of complex cases. | Overreliance on AI-generated multimodal patterns risks loss of interpretive judgment, detachment from patient context, and erosion of clinician intuition. | Advocates clinician participation throughout AI development pipeline—design, validation, and deployment—to ensure contextual fit and trust. | Conceptual paper, no empirical validation; limited generalizability. |
| 17 | Abhari et al. [46] | State-of-the-Art Review | Human-in-the-loop machine learning (HITL-ML) across disciplines, including healthcare | Narrative synthesis | HITL-ML (active learning, interactive learning, machine teaching, explainable AI) | Human involvement enhances ML adaptability and efficiency in clinical contexts, enabling better annotation, faster convergence, and contextual relevance. | Risks include biased or inconsistent human inputs, overfitting to expert annotations, and dependency on oracles; automation bias still present. | Promotes “Usable AI” and “Useful AI” paradigms—systems designed with clinician participation and human-centered transparency. | Theoretical synthesis; lacks healthcare-specific empirical outcomes. |
| 18 | Mosqueira-Rey et al. [44] | Conceptual Review (AI Review) | Human-in-the-loop ML frameworks | Literature-based analysis | HITL-ML for explainable and interactive clinical learning | Involving humans in the ML loop enhances model interpretability, adaptability, and decision relevance in clinical data environments. | Excessive automation or oracle reliance may limit human reasoning and generalization of expertise. | Advocates inclusion of explainable AI (XAI), curriculum learning, and transparent annotation interfaces for clinicians. | Overlaps with earlier HITL models; limited empirical support. |
| 19 | Natali et al. [12] | Mixed-Method Review (Systematic + Narrative) | Healthcare professionals and trainees; review of deskilling literature | 22 empirical + 62 conceptual papers | AI systems in diagnostic decision support and medical education | AI enhances efficiency, standardizes diagnostic processes, and reduces variability in outcomes. | Identifies “AI-induced deskilling” and “upskilling inhibition” — clinicians risk loss of core diagnostic and physical examination skills. | Proposes research agenda for longitudinal monitoring, hybrid education models, and continuous reskilling frameworks. | Lacks quantitative metrics for skill loss; dependent on conceptual synthesis. |
| 20 | Bhuyan et al. [3] | Narrative Review | Global healthcare systems (clinical and administrative contexts) | Conceptual | Generative AI for clinical excellence, administrative efficiency, and training | Improves patient care, personalized medicine, and operational efficiency; automates documentation, treatment planning, and predictive analytics. | Risk of workforce overreliance, privacy issues, and reduced human oversight in decision-making. | Advocates ethical deployment, clinician–AI collaboration, and governance standards. | Non-empirical; broad scope across disciplines; lacks quantitative data. |
| 21 | Sandmann et al. [48] | Experimental Comparative Study | Clinical case reports across multiple medical disciplines | 110 medical cases | GPT-3.5, GPT-4, Llama 2 for diagnostic, examination, and treatment tasks | GPT-4 showed highest diagnostic accuracy and consistency (κ=0.76–0.8); outperforming GPT-3.5 and Google Search in diagnosis and examination support. | Performance dropped in rare diseases; automation bias and potential overconfidence risk identified. | Emphasizes need for regulation, validation, and responsible AI deployment in clinical settings. | Limited to simulated data; not evaluated in real clinical environments. |
| 22 | Yu et al. [27] | Large-scale Experimental Study | 140 radiologists across 15 chest X-ray diagnostic tasks | 140 clinicians, 324 cases | AI-assisted radiology diagnostics | AI assistance improved accuracy and reduced error for some radiologists; effects heterogeneous. | AI errors degraded clinician performance in half of cases; experience or training failed to predict outcomes. | Recommends personalized AI calibration and adaptive support rather than uniform AI assistance. | Limited to radiology; lacks longitudinal performance assessment. |
| 23 | Shieh et al. [28] | Experimental Study | Clinical education and diagnostic tasks (USMLE Step 2 CK) | 109 Step 2 questions and 63 case reports | ChatGPT 3.5 and 4.0 evaluated for exam and clinical reasoning performance | ChatGPT 4.0 achieved 87.2% accuracy vs 47.7% for 3.5; improved reasoning and diagnostic precision. | Prone to hallucinations, citation errors, and misordering of differentials; potential for misplaced clinician trust. | Encourages controlled educational use and continuous model improvement; oversight by clinicians. | Focused on standardized exams; limited generalizability to real clinical environments. |
| 24 | Mittermaier et al. [43] | Editorial / Conceptual Review | Surgical AI systems in performance assessment | Commentary on SAIS model bias | AI for surgical skill evaluation (SAIS model) | AI improves objective assessment of surgeon performance and training consistency. | Identified underskilling/overskilling bias and inequity in algorithmic evaluation. | Introduced TWIX framework — teaches model to recognize clip importance, mitigating bias and improving fairness. | Conceptual; focused on one model; limited generalizability. |
| 25 | Goodell et al. [39] | Experimental Evaluation | Clinical calculation tasks from MDCalc; tested ChatGPT and LLaMa models | 10,000 trials (212 vignettes) | Tool-augmented LLMs for clinical calculations (OpenMedCalc, RAG, code interpreter) | Tool-using LLMs (RAG + OpenMedCalc) improved accuracy up to 88%, reducing computational errors and enhancing clinical reliability. | Base LLMs (GPT-4, LLaMa) prone to arithmetic hallucinations and assignment errors, potentially misleading clinicians in quantitative reasoning. | Integration of external tool APIs and code interpreters can augment LLM reliability in medical calculations. | Limited to simulated vignettes; lacks live clinical validation. |
| 26 | Gomez et al. [41] | Randomized Controlled Experiment | 121 telehealth clinicians screening strep throat via smartphone images | 121 participants | Explainable AI (XAI)-based Clinical Decision Support Systems (CDSS) | XAI-CDSS improved diagnostic accuracy for strep throat screening compared to Centor Score-only method. | Despite higher accuracy, clinicians reported lower trust in AI advice, leading to more confirmatory tests. | Highlights need for transparency and user-centered design to build trust; recommend hybrid models combining AI predictions with clinical rationale. | Mock-up prototype, limited to strep throat; not generalizable. |
| 27 | Choudhury & Chaudhry [35] | Conceptual Viewpoint | Healthcare practitioners and LLM-based systems | Theoretical | Large Language Models (LLMs) in clinical decision-making | LLMs increase efficiency and information retrieval in diagnostics, research, and documentation. | Highlights “self-referential learning loop” and “deskilling” where clinicians lose skills due to overreliance on AI; feedback loop may reduce LLM accuracy over time. | Advocates balanced trust and skepticism, with clinician oversight and continuous validation of AI outputs. | Theoretical; lacks empirical validation or real-world case data. |
| 28 | Khan [36] | Opinion / Perspective | Clinical neurology and diagnostic medicine | Conceptual narrative | AI in clinical diagnostics and EEG interpretation | AI enhances efficiency, accuracy, and diagnostic throughput, especially in neurodiagnostics. | Warns of “AI-induced erosion” of clinical reasoning and loss of localization and interpretive skills; dependence may diminish foundational judgment. | Recommends balanced AI integration in training curricula and maintaining traditional skill-building alongside AI adoption. | Opinion-based; lacks quantitative analysis. |
| 29 | Bongurala et al. [34] | Commentary / Review | U.S. healthcare documentation systems | Conceptual | AI tools for medical documentation (voice-to-text, NLP summarization, charting AI) | AI documentation systems reduce time on EHRs, improve accuracy, and lower clinician burnout by automating note-taking and record management. | Overreliance may cause decreased critical review and analytical engagement with medical records. | Calls for balance between automation and clinician authorship; recommends explainable, auditable documentation systems. | Commentary; lacks empirical evaluation. |

# Appendix-C

Table C1. CASP Quality Appraisal of Included Studies

| **No.** | **Study (Author, Year)** | **Reference No.** | **Study Design** | **CASP (/10)** | **Quality** |
| --- | --- | --- | --- | --- | --- |
| 1 | Sadeghi et al., 2024 | [29] | Systematic Review | 8 | High |
| 2 | Budzyn et al., 2025 | [13] | Observational | 7 | Moderate |
| 3 | Goh et al., 2024 | [45] | Controlled Experimental | 8 | High |
| 4 | Dratsch et al., 2023 | [38] | Experimental | 8 | High |
| 5 | Ranji, 2024 | [40] | Experimental Validation | 7 | Moderate |
| 6 | Tikhomirov et al., 2024 | [37] | Conceptual Viewpoint | 7 | Low |
| 7 | Iqbal et al., 2025 | [32] | Umbrella Review | 8 | High |
| 8 | Najjar, 2023 | [42] | Narrative Review | 7 | Low |
| 9 | Arab et al., 2025 | [47] | Narrative Review | 7 | Low |
| 10 | Ueda et al., 2023 | [26] | Comparative Study | 8 | High |
| 11 | Hirosawa et al., 2024 | [25] | Experimental | 8 | High |
| 12 | Morone et al., 2025 | [10] | Umbrella Review | 8 | High |
| 13 | Hasanzadeh et al., 2025 | [4] | Narrative Review | 7 | Moderate |
| 14 | Beheshti et al., 2025 | [31] | Systematic Review | 8 | High |
| 15 | Arvai et al., 2025 | [30] | Scoping Review | 7 | Moderate |
| 16 | Banerji et al., 2025 | [33] | Viewpoint | 7 | Low |
| 17 | Abhari et al., 2024 | [46] | State-of-the-Art Review | 7 | Low |
| 18 | Mosqueira-Rey et al., 2022 | [44] | Conceptual Review | 7 | Low |
| 19 | Natali et al., 2025 | [12] | Mixed-Method Review | 7 | Moderate |
| 20 | Bhuyan et al., 2025 | [3] | Narrative Review | 8 | Low |
| 21 | Sandmann et al., 2025 | [48] | Experimental Comparative | 8 | High |
| 22 | Yu et al., 2024 | [27] | Large-scale Experimental | 9 | High |
| 23 | Shieh et al., 2024 | [28] | Experimental | 8 | High |
| 24 | Mittermaier et al., 2023 | [43] | Editorial / Conceptual | 7 | Low |
| 25 | Goodell et al., 2025 | [39] | Experimental | 8 | High |
| 26 | Gomez et al., 2024 | [41] | Randomized Controlled Trial | 9 | High |
| 27 | Choudhury & Chaudhry, 2024 | [35] | Conceptual Viewpoint | 9 | Low |
| 28 | Khan, 2025 | [36] | Opinion / Perspective | 8 | Low |
| 29 | Bongurala et al., 2024 | [34] | Commentary / Review | 8 | Low |
